# Supplementary material for: Poly beta amino ester coated emulsions of NSAIDs for cartilage treatment
Source: Royal Society of Chemistry journal article supplement (doi:10.1039/d1tb01024g), 2021-01-01
Supplement: d1tb01024g1.pdf [file d1tb01024g1.pdf]

# Poly beta amino esters coated emulsions designed for NSAIDs osteoarthritis treatment

by

Tahani Saeedi <sup>1</sup>, Polina Prokopovich <sup>1,\*</sup>

<sup>1</sup> Cardiff School of Pharmacy and Pharmaceutical Sciences, Cardiff University, UK

## **Supplementary data**

\* Corresponding author: Dr Polina Prokopovich

School of Pharmacy and Pharmaceutical Sciences

Cardiff University

Redwood Building, King Edward VII Avenue

Cardiff, UK

CF10 3NB

*E-mail address: prokopovichp@cf.ac.uk*

Table S1. HPLC operating parameters

| <b>NSAIDs</b>     | <b>Mobile phase</b>                                 | <b>UV detector (nm)</b> |
|-------------------|-----------------------------------------------------|-------------------------|
| indomethacin      | Acetonitrile and acetate buffer pH 3.6 (60:40)      | 255                     |
| ketorolac         | Acetonitrile, PBS and acetic acid glacial (26:70:4) | 315                     |
| naproxen          | Acetonitrile and acetate buffer pH 4 (35:65)        | 230                     |
| diclofenac sodium | Acetonitrile and acetate buffer pH 4 (42:58)        | 276                     |

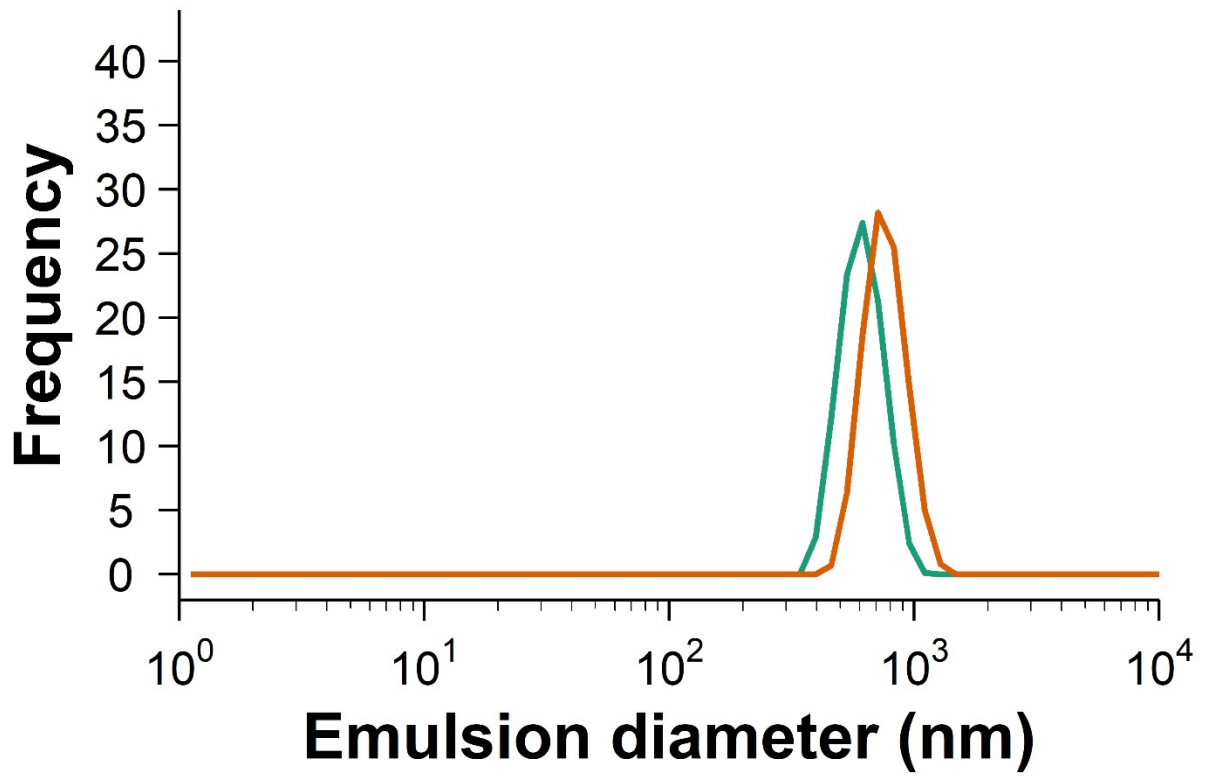

Figure S1. Examples of hydrodynamic size distribution of 10% w/o ( ) uncoated and ( ) PBAE coated pure oleic acid 10% o/w emulsions.

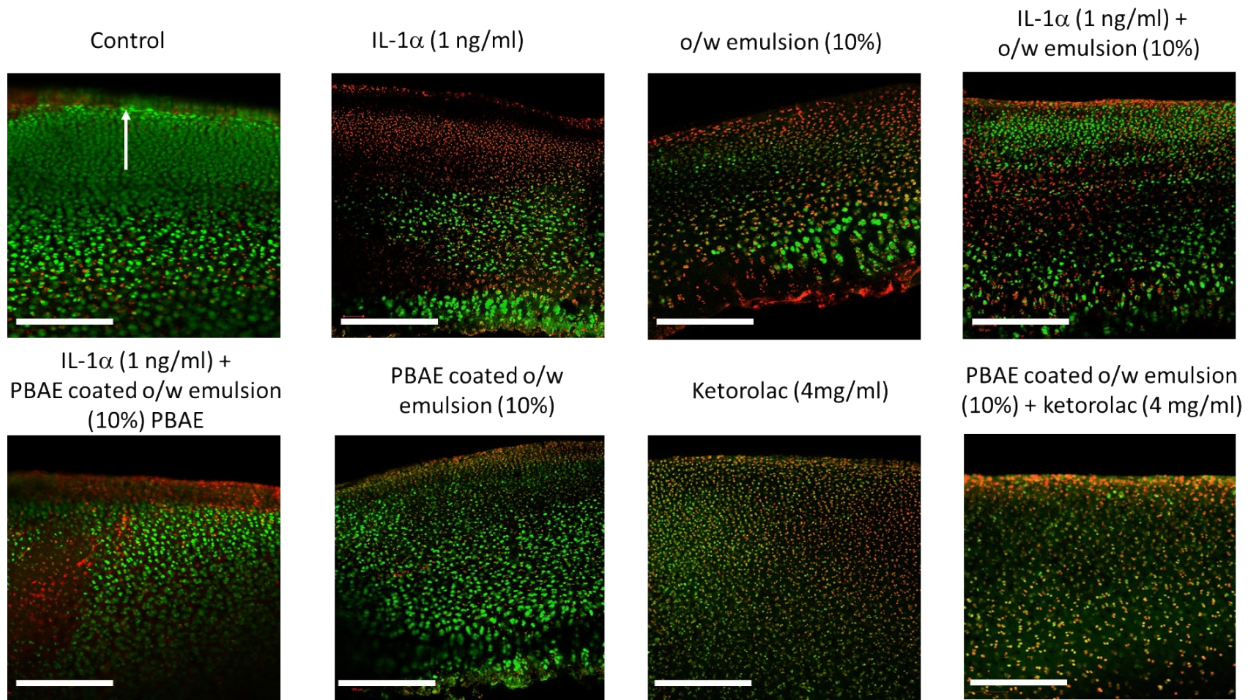

Figure S2. Examples of images of live/dead fluorescently stained bovine explants exposed to IL-1 $\alpha$  (1 ng/mL) and ketorolac control samples incubated for 1 day. Scale bar = 500  $\mu$ m.

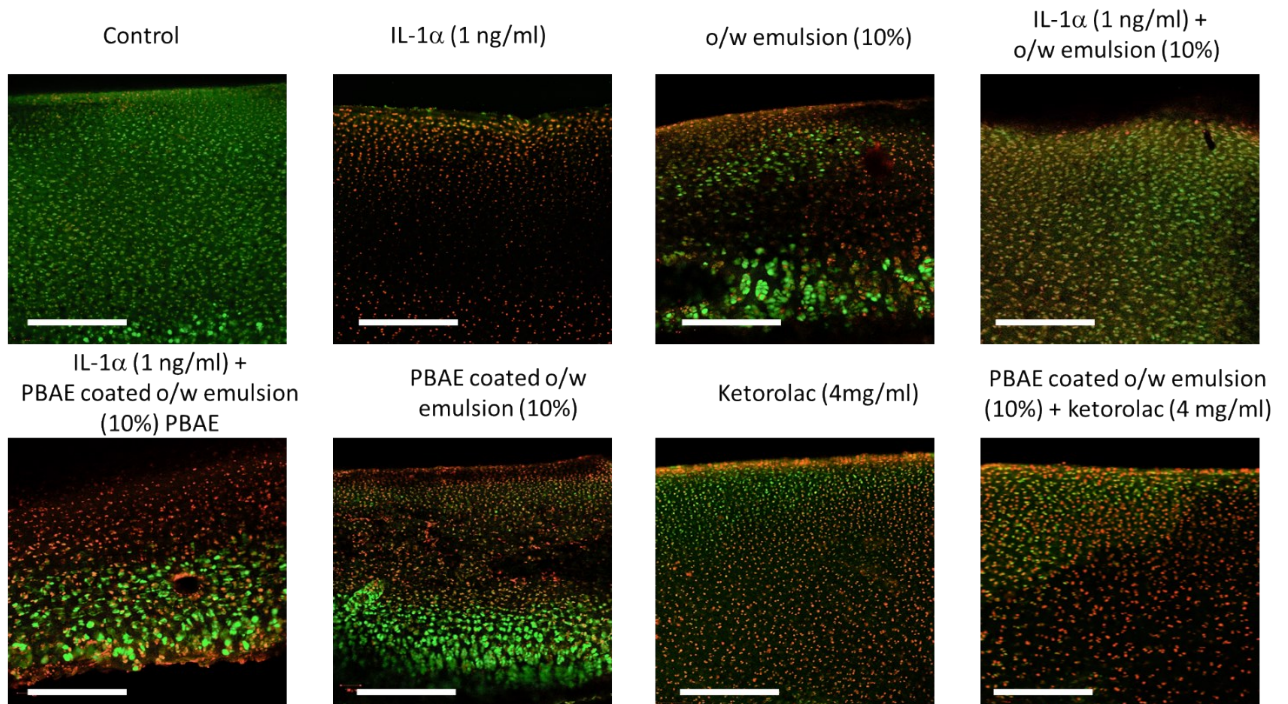

Figure S3. Examples of images of live/dead fluorescently stained bovine explants exposed to IL-1 $\alpha$  (1 ng/mL) and ketorolac control samples incubated for 2 days. Scale bar = 500  $\mu$ m.

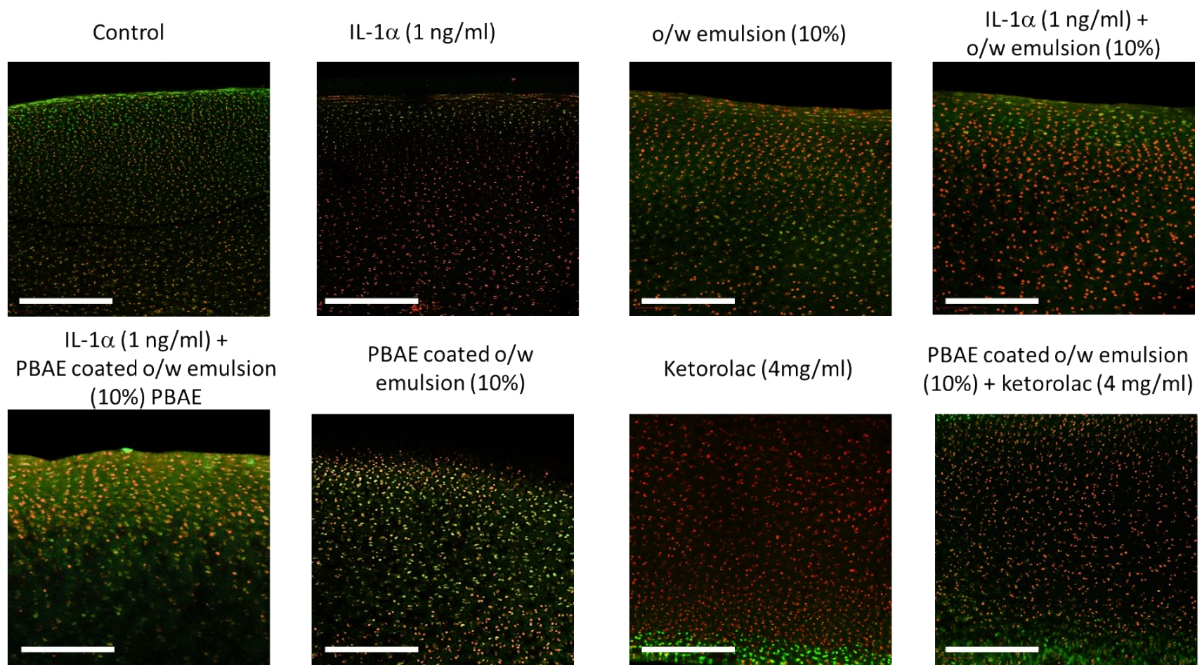

Figure S4. Examples of images of live/dead fluorescently stained bovine explants exposed to IL-1 $\alpha$  (1 ng/mL) and ketorolac control samples incubated for 7 days. Scale bar = 500  $\mu$ m.
